# Supplementary material for: Enquiry-based learning: experiences of first year chemistry students learning spectroscopy
Source: Royal Society of Chemistry journal article supplement (doi:10.1039/c0rp90016h), 2011-01-01
Supplement: c0rp90016h.pdf [file c0rp90016h.pdf]

## Enquiry-Based Learning: Experiences of First Year Chemistry Students Learning Spectroscopy

Timothy Lucas and Natalie M. Rowley

### Supplementary material

#### Clarification of data relating to shifts in students perceived confidence

An example illustrates the method employed.

For the question which indicates student self-evaluation of their understanding of how mass spectrometry works, the data (as frequencies) are:

| N = 42          |                                                 | <i>Strongly agree</i> | <i>Agree</i> | <i>Neutral</i> | <i>Agree</i> | <i>Strongly agree</i> |                                                        |
|-----------------|-------------------------------------------------|-----------------------|--------------|----------------|--------------|-----------------------|--------------------------------------------------------|
| <i>Pre-EBL</i>  | <i>I understand how mass spectrometry works</i> | 14                    | 21           | 5              | 1            | 1                     | <i>I do not understand how mass spectrometry works</i> |
| <i>Post-EBL</i> |                                                 | 21                    | 20           | 1              | 0            | 0                     |                                                        |

The data in the “Pre- and Post-EBL Sessions” column of Table 1 represent the *total number* of students who responded in each of the categories.

In light of the fact that we couldn't use a statistical analysis (due to the small size of the data set), we devised an approach to look at shifts in an *individual student's* responses between the pre-EBL and post-EBL surveys. It is from this analysis that the “changes in confidence” data are derived.

For this method, the following were used:

|          |                   |          |         |          |                |
|----------|-------------------|----------|---------|----------|----------------|
| Response | Strongly Disagree | Disagree | Neutral | Agree    | Strongly Agree |
| Value    | -2                | -1       | 0       | 1        | 2              |
| Category | Negative          |          | Neutral | Positive |                |

When a pre-and post-intervention data set is available, the *difference* between a student's responses can be evaluated on a rating scale using this method

| Moves (+/-) | Information provided                                                                                                                                                                                                                    |
|-------------|-----------------------------------------------------------------------------------------------------------------------------------------------------------------------------------------------------------------------------------------|
| 0           | A move of zero shows that an individual is responding identically in both data sets.                                                                                                                                                    |
| 1           | In most cases, moves of +/- 1 do not provide any specific information on individuals' responses, but a trend may be observed (i.e. if there are a lot of responses in this category). In most cases there are a number of +/- 1 shifts. |
| 2           | A move of 2 represents a distinct change of category on the rating scale (i.e. from a negative response to a neutral or positive response, or vice versa).                                                                              |
| 3           | A move of 3 illustrates a major shift in response. Two possible examples are a change from a "Disagree" to a "Strongly Agree" or from a "Strongly Disagree" to an "Agree" response.                                                     |
| 4           | A move of 4 is the most extreme shift, being from one end of the scale to the other ("Strongly Agree" to "Strongly Disagree" or vice versa).                                                                                            |

The mass spectrometry data in the "changes in confidence" part of the table comes from an analysis of individual student's responses:

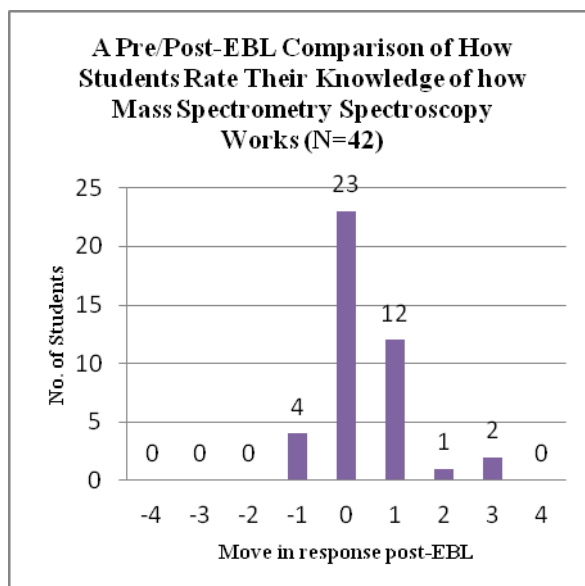

If a student's perceived confidence was the same pre- and post-EBL they were assigned as "0". 23 students of the 42 gave the same response pre- and post-EBL which gives 55%.

If a student indicated a higher level of confidence post-EBL *i.e.* a shift in response in the direction of "agree" to "strongly agree" to the statement of "I understand how mass spectrometry works", then this was a positive shift (between 1 and 4). It can be seen that a total of 15 students indicated a positive shift, hence 36%.

If a student indicated a lower level of confidence post-EBL *i.e.* a shift in response in the direction of "agree" to "strongly agree" to the statement of "I do not understand how mass spectrometry works", then this was a negative shift (between -1 and -4). It can be seen that a total of 4 students indicated a negative shift, hence 9%.
